# Supplementary material
Source: Springer Nature journal article supplement (https://www.springermedizin.de/resource/supplementary/12888_2011_949_MOESM3_ESM.pdf/9478998)
Supplement: MOESM3 [file 9478998]

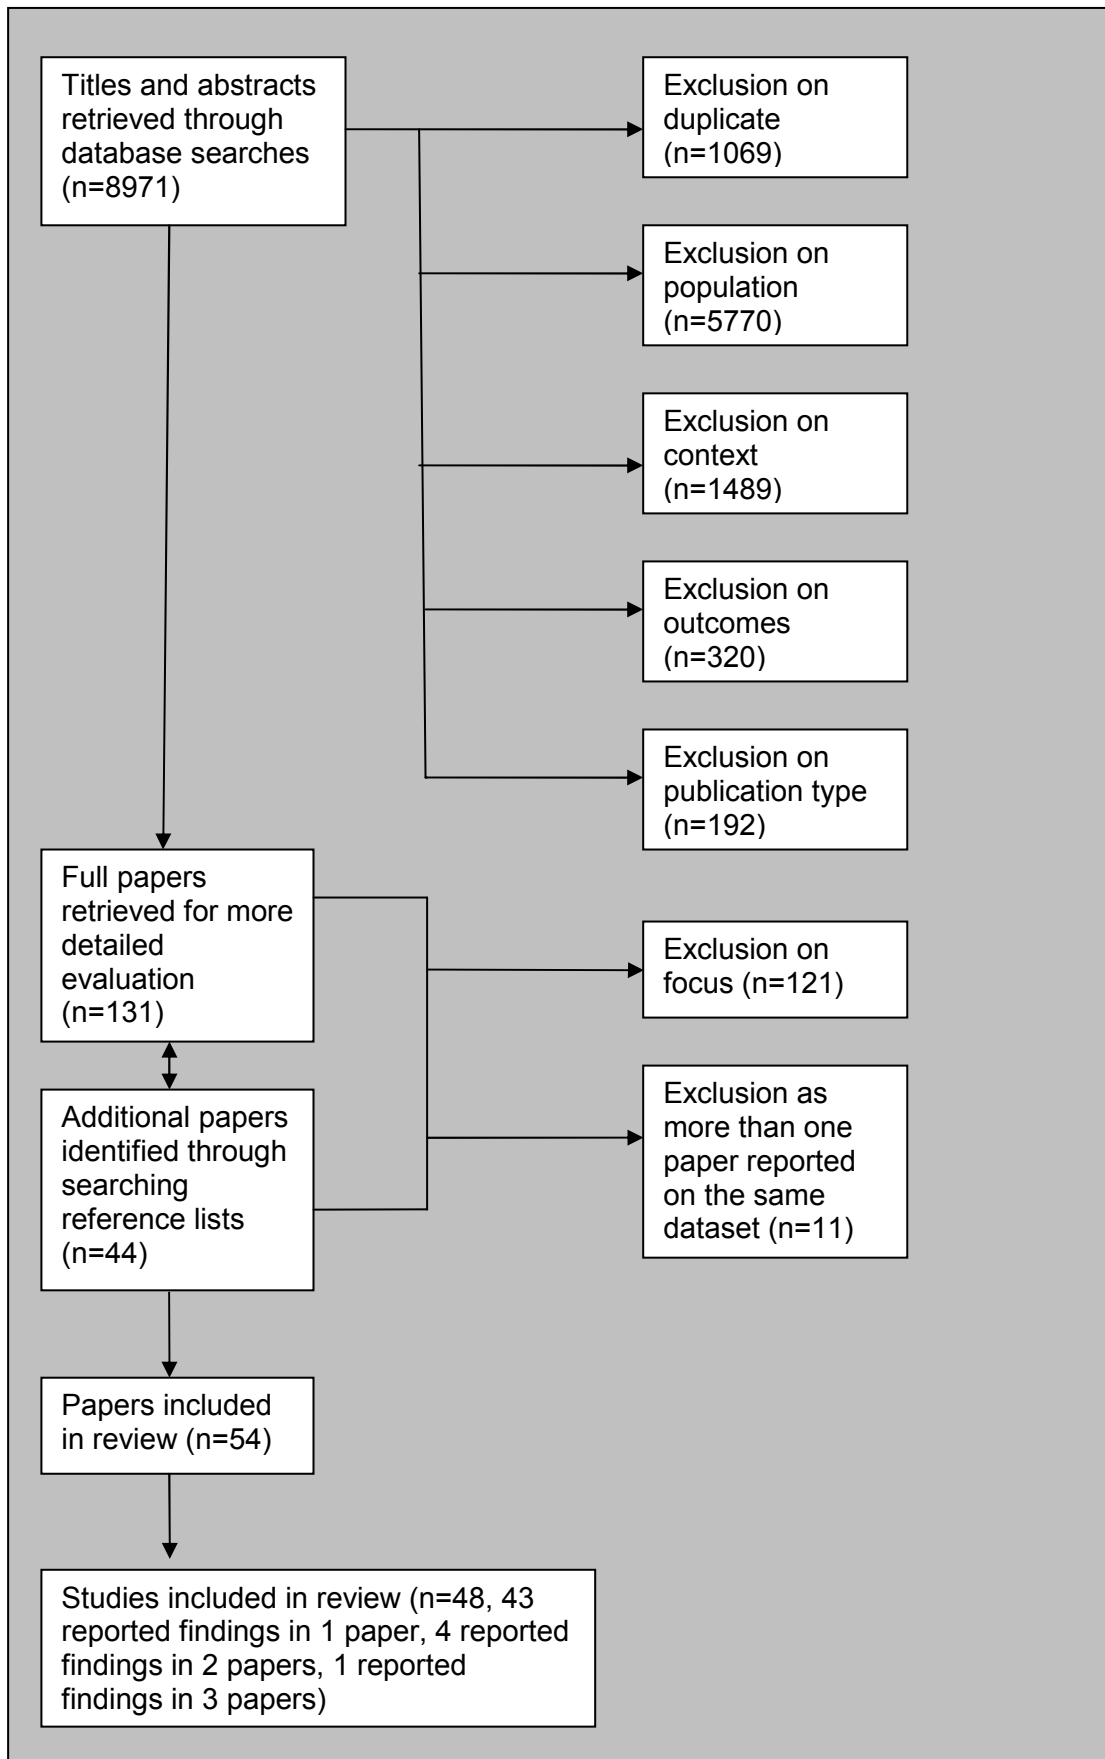

Titles and abstracts retrieved through database searches (n=8971)

Exclusion on duplicate (n=1069)

Exclusion on population (n=5770)

Exclusion on context (n=1489)

Exclusion on outcomes (n=320)

Exclusion on publication type (n=192)

Full papers retrieved for more detailed evaluation (n=131)

Exclusion on focus (n=121)

Additional papers identified through searching reference lists (n=44)

Exclusion as more than one paper reported on the same dataset (n=11)

Papers included in review (n=54)

Studies included in review (n=48, 43 reported findings in 1 paper, 4 reported findings in 2 papers, 1 reported findings in 3 papers)
